# 1 Sensitive one-step isothermal detection of pathogen-derived RNAs

2

3 Chang Ha Woo<sup>1,3</sup>, Sungho Jang<sup>2,3†</sup>, Giyoung Shin<sup>1</sup>, Gyoo Yeol Jung<sup>1,2\*</sup>, and Jeong Wook

4 Lee<sup>1,2\*</sup>

5

6 <sup>1</sup>School of Interdisciplinary Bioscience and Bioengineering, Pohang University of Science  
7 and Technology, 77 Cheongam-ro, Nam-gu, Pohang, Gyeongbuk 37673, Korea

8 <sup>2</sup>Department of Chemical Engineering, Pohang University of Science and Technology, 77  
9 Cheongam-ro, Nam-gu, Pohang, Gyeongbuk 37673, Korea

10 <sup>3</sup>These authors contributed equally to this work

11 <sup>†</sup>Present address: Department of Biomedical Engineering and Biological Design Center,  
12 Boston University, Boston, MA 02215, USA.

13 \*Correspondence to Jeong Wook Lee ([jeongwook@postech.ac.kr](mailto:jeongwook@postech.ac.kr)) and Gyoo Yeol Jung  
14 ([gyjung@postech.ac.kr](mailto:gyjung@postech.ac.kr))

15

## 16 **Abstract**

17 The recent outbreaks of Ebola, Zika, MERS, and SARS-CoV-2 (2019-nCoV) require fast,  
18 simple, and sensitive onsite nucleic acid diagnostics that can be developed rapidly to prevent  
19 the spread of diseases. We have developed a SENSitive Splint-based one-step isothermal  
20 RNA detection (SENSR) method for rapid and straightforward onsite detection of pathogen  
21 RNAs with high sensitivity and specificity. SENSR consists of two simple enzymatic  
22 reactions: a ligation reaction by SplintR ligase and subsequent transcription by T7 RNA  
23 polymerase. The resulting transcript forms an RNA aptamer that induces fluorescence. Here,  
24 we demonstrate that SENSR is an effective and highly sensitive method for the detection of  
25 the current epidemic pathogen, *severe acute respiratory syndrome-related coronavirus 2*  
26 (SARS-CoV-2). We also show that the platform can be extended to the detection of five other  
27 pathogens. Overall, SENSR is a molecular diagnostic method that can be developed rapidly  
28 for onsite uses requiring high sensitivity, specificity, and short assaying times.

## 29 **Introduction**

30 Increasing global trade and travel are considered the cause of frequent emergence and rapid  
31 dissemination of infectious diseases around the world. Some life-threatening infectious  
32 diseases often have signs and symptoms similar to cold or flu-like syndromes. Early diagnosis  
33 is therefore essential to identify the diseases and provide the correct treatment. Immediate and  
34 onsite diagnostic decisions also help to prevent the spread of epidemic and pandemic  
35 infectious diseases<sup>1-3</sup>. In order to rapidly diagnose infectious diseases, a nucleic acid-based  
36 diagnosis has emerged as an alternative to the conventional culture-based, or immunoassay-  
37 based, approaches due to their rapidity or specificity<sup>4-6</sup>.

38 To increase sensitivity, current nucleic acid detection methods generally involve a  
39 target amplification step prior to the detection step. The conventional amplification method is  
40 based on PCR, which requires a thermocycler for delicate temperature modulation. As an  
41 alternative to the thermal cycling-based amplification, isothermal amplification methods are  
42 available, which rely primarily on a strand-displacing polymerase or T7 RNA polymerase at a  
43 constant temperature<sup>7</sup>. However, the complex composition of the isothermal amplification  
44 mixtures often renders these approaches incompatible with detection methods and whole  
45 diagnosis generally becomes a multi-step process<sup>8-11</sup>. The diagnostic regimen with multi-step  
46 procedures requires additional time, instruments, and reagents, as well as skilled personnel to  
47 perform the diagnostic procedure. This aspect limits the broad applicability of nucleic acid  
48 diagnostics, especially in situations where rapid and simple detection is required.

49 Ligation-dependent nucleic acid detection is a sequence-specific method that  
50 primarily depends on ligation of two separate probes that hybridize to adjacent sites of the  
51 target sequence<sup>12</sup>. Because of their specificity, the ligation-dependent methods are used for  
52 detection of markers of genetic disorders<sup>13,14</sup> and pathogens<sup>15,16</sup>, typically combined with  
53 subsequent amplification and signal generation methods. In particular, the SplintR ligase can

54 efficiently ligate two DNA probes using a target single-stranded RNA as a splint, enabling  
55 the sequence-specific detection of RNA molecule<sup>17,18</sup>. Because the reaction components of  
56 the ligation-dependent methods are relatively simple, we hypothesized that the ligation-  
57 dependent method could be exploited to establish a one-step RNA detection platform when  
58 combined with compatible amplification and signal generation methods in a single reaction  
59 mixture.

60 In this study, we developed a one-step, ligation-dependent isothermal reaction  
61 cascade that enables rapid detection of RNAs with high sensitivity, termed SENSitive Splint-  
62 based one-step isothermal RNA detection (SENSR). SENSR consists of two simple  
63 enzymatic reactions, a ligation reaction by SplintR ligase and subsequent transcription by T7  
64 RNA polymerase. The resulting transcript forms an RNA aptamer that binds to a fluorogenic  
65 dye and produces fluorescence only when target RNA exists in a sample. SENSR was able to  
66 detect target RNA of Methicillin-Resistant *Staphylococcus aureus* (MRSA) in 30 minutes  
67 with a limit of detection of 0.1 aM. We further applied this platform to detect various  
68 pathogens, *Vibrio vulnificus*, *Escherichia coli* O157:H7, Middle East Respiratory Syndrome-  
69 related Coronavirus (MERS-CoV), and Influenza A viruses, by merely redesigning the  
70 hybridization regions of the probes. Finally, we demonstrated the fast development of the  
71 SENSR assay for the latest epidemic pathogen, *Severe acute respiratory syndrome-related*  
72 *coronavirus 2* (SARS-CoV-2 or 2019-nCoV), using minimal, publicly available information.

73

## 74 **Results**

### 75 **Design of one-step, isothermal reaction cascade**

76 We designed a reaction cascade that allows the one-step diagnostic test, in which all reaction  
77 steps for nucleic acid detection occur simultaneously in a single tube (Fig. 1). The cascade  
78 consists of four core components, which includes only two enzymes: a set of oligonucleotide

79 probes, SplintR ligase, T7 RNA polymerase, and a fluorogenic dye. The components were  
80 mixed in a buffer solution with ribonucleotides. Upon addition of the pathogen-derived RNA  
81 sample, the reaction steps of ligation, transcription, and dye-aptamer binding enabled  
82 detection, amplification, and signal production, respectively.

83 Two single-stranded DNA probes were designed to include several functional parts  
84 involved in amplification, detection, and signal generation, thereby eliminating the need for  
85 human intervention during the entire diagnostic process (Fig. 1). First, the promoter probe  
86 consists of an upstream hybridization sequence (UHS) and a stem-loop T7 promoter. The  
87 UHS hybridizes to the 5'-half of a target RNA region. The stem-loop T7 was adopted from  
88 the literature<sup>19</sup> (Supplementary Table 1) to form an active, double-stranded T7 promoter  
89 using a single-stranded oligonucleotide. The sequence of the UHS was designed by Primer-  
90 BLAST<sup>20</sup> to ensure specific binding to the target RNA. Among candidate UHS sequences, we  
91 chose the one with minimal secondary structure at 37 °C predicted by NUPACK<sup>21</sup> to  
92 maximize the hybridization between the UHS and its target region (Supplementary Table 2).  
93 The 5'-end of the promoter probe was then phosphorylated for ligation. Next, a reporter probe  
94 consists of a downstream hybridization sequence (DHS) and a template sequence for a dye-  
95 binding RNA aptamer. The DHS contains the complementary sequence to the other half of  
96 the target RNA region. Similar to the UHS, the DHS was selected to have minimal predicted  
97 secondary structure (Supplementary Table 2).

98 Once both UHS and DHS probes hybridize correctly to the target RNA, SplintR  
99 ligase can initiate the cascade by connecting the probes that have all features built for the one-  
100 step diagnostic test. Subsequently, T7 RNA polymerase can synthesize the RNA aptamer  
101 using the full-length, ligated probe as a DNA template, which can be bound with the  
102 fluorogenic dye to emit fluorescence as an output (Fig. 1). Notably, the reaction scheme of  
103 SENSR inherently supports two mechanisms that could amplify the signal: 1) multiple

104 transcription events from the full-length, ligated probe by T7 RNA polymerase and 2) the  
105 presence of target RNA sequence on the full-length transcript which could be utilized as an  
106 additional splint for unligated probes in the reaction mixture. Accordingly, SENSr could  
107 enable sensitive RNA detection without any pre-amplification steps.

108

### 109 **Construction of each component reaction in SENSr**

110 In this study, we used MRSA as a model case to validate each reaction step that constitutes  
111 SENSr. MRSA is of particular interest because it requires significant effort to minimize  
112 healthcare-related infections and prevent future infectious diseases of drug-resistant  
113 pathogens<sup>22</sup>.

114 First, we designed a pair of probes that target the *mecA* transcript of MRSA following  
115 the probe design process described in the previous section (Supplementary Note 1 and  
116 Supplementary Tables 1 and 3), and the RNA-splinted ligation between the two probes was  
117 tested. The probes were ligated using SplintR ligase with or without the target RNA, and the  
118 reaction resultants were further amplified with a pair of PCR primers and analyzed (see  
119 Methods section). The correct size of the PCR product was obtained only when the two  
120 probes and target RNA were added together to the ligation mixture (Fig. 2a). This result  
121 indicates that our probes were successfully ligated only in the presence of the target RNA.

122 We then used the ligated probe as a DNA template to test whether transcription could  
123 occur. The ligation mixture was added at a 1/10 ratio to the *in vitro* transcription reaction  
124 mixture with T7 RNA polymerase. Only when the target RNA was present in the ligation  
125 reaction was the full-length transcript (92 nt) observed from transcription, thereby confirming  
126 both target-dependent ligation and the subsequent transcription (Fig. 2b).

127 Finally, we confirmed that the transcript from the full-length ligated probe could  
128 produce fluorescence upon binding to the fluorogenic dye. The reaction mixture of sequential

129 ligation and transcription reactions were purified, and an equal amount of RNAs from each  
130 combination was incubated with the fluorogenic dye (Fig. 2c). The RNA product from the  
131 reaction mixture with the two probes and target RNA produced higher fluorescence than that  
132 of the other combinations. Therefore, we confirmed that the target RNA could be detected  
133 using a set of probes by performing each component reaction in SENSR.

134

### 135 **Development of one-step isothermal reaction cascade**

136 Since all component reactions in SENSR were validated in their respective buffers, we then  
137 sought to develop a one-step reaction condition with a single reaction buffer at a single  
138 temperature, where all reaction steps, including probe annealing, ligation, transcription, and  
139 aptamer fluorescence reaction occur simultaneously. To accomplish this, we first investigated  
140 a wide range of temperatures (25–95 °C) for hybridization of the probes and target. Then,  
141 each mixture was subjected to the sequential ligation, transcription reactions, and  
142 fluorescence reaction described in the previous section. Remarkably, fluorescence was  
143 observed at all hybridization temperatures, including 35 °C and 40 °C (Supplementary Fig.  
144 1), the optimal temperature ranges for enzyme activities in SENSR, thereby suggesting that  
145 the entire reaction can be built up as an isothermal reaction.

146 Additionally, a single reaction buffer composition suitable for all reaction steps was  
147 configured to establish all reactions in one pot. Since T7 RNA polymerase reaction buffer has  
148 the most inclusive composition of the four reaction buffers (probe annealing, ligation,  
149 transcription, and aptamer fluorescence reaction buffers) we used T7 RNA polymerase buffer  
150 as a basis for the optimization. Various reaction conditions were optimized, including the  
151 reaction temperature and concentrations of various enzymes, and components to enhance the  
152 fluorescence signal (Supplementary Note 2 and Supplementary Figs. 2 and 3). The optimized

153 SENSR condition enabled the detection of target RNA in a one-pot isothermal reaction at  
154 37 °C.

155

### 156 **Rapid and sensitive RNA detection by SENSR**

157 Since the one-step and one-pot isothermal reaction condition was established, we then  
158 assessed the sensitivity and turnaround time of SENSR. We evaluated the sensitivity by  
159 measuring fluorescence from one-step reactions containing the *mecA* probe pair and synthetic  
160 *mecA* RNA in the range of 0.1 aM to 220 nM (Fig. 3a). Notably, the detection limit was as  
161 low as 0.1 aM (corresponding to 6 molecules per 100 µL reaction), indicating the high  
162 sensitivity of SENSR. Moreover, the linearity of the fluorescence intensity over a wide range  
163 of concentrations ( $R^2 = 0.9932$ ) suggests that SENSR can be used for target RNA  
164 quantification.

165 We then measured the minimal turnaround time required to confirm the presence of  
166 the target RNA in a sample. The target RNA ranging from 0.1 aM to 10 aM were added to the  
167 SENSR reaction, and fluorescence was measured every 30 minutes. The fluorescence with  
168 0.1 aM was discernible against the negative control in only 30 minutes (Fig. 3b). Further  
169 incubation of the reaction better distinguished the target RNA-containing reaction from the  
170 negative control reaction. Collectively, the SENSR reaction was able to specifically detect the  
171 target RNA within 30 minutes with a detection limit of 0.1 aM.

172

### 173 **Broad adaptability of SENSR for pathogen detection**

174 With the fast and sensitive RNA detection using SENSR, we next attempted to reconfigure  
175 this platform for the detection of RNA markers from various pathogens. Target RNA  
176 sequences for SENSR are specified by only two hybridization regions (UHS and DHS) of  
177 probes, which makes the probe design process fast and straightforward without many



178 computational steps. This design feature, requiring only nucleotide sequences to build  
179 molecular diagnostics, allows for easy construction of SENSR probes for any infectious  
180 diseases (Fig. 4a).

181 To demonstrate SENSR for various pathogens, we first targeted two pathogenic  
182 microorganisms, *V. vulnificus* and *E. coli* O157:H7. *V. vulnificus* is known to cause  
183 gastroenteritis, wound infection, and sepsis in humans. We designed a probe pair targeting  
184 *vvhA* (Supplementary Table 3), a *V. vulnificus*-specific target encoding extracellular  
185 hemolysin with hemolytic activity and cytotoxic effect. The sensitivity of SENSR reaction  
186 using the probe pair and *in-vitro*-transcribed *vvhA* RNA was as low as 0.1 aM (Fig. 4b), and a  
187 linear correlation was observed between the concentration of RNA and the fluorescence  
188 intensity ( $R^2=0.9566$ ).

189 Next, we used SENSR to detect *E. coli* O157:H7, which causes foodborne illness.  
190 Similar to that for *V. vulnificus*, we designed a probe pair for *E. coli* O157:H7-specific target  
191 gene, *tir* (Supplementary Table 3), for SENSR reaction. Similarly, RNA concentrations as  
192 low as 0.1 aM were detected by SENSR and a high linear correlation between the  
193 concentration of RNA and the fluorescence intensity was observed (Fig. 4c;  $R^2=0.9684$ ).

194 The target was expanded to human-infective RNA viruses that cause fatal diseases<sup>23</sup>.  
195 First, we aimed at Middle East Respiratory Syndrome-related Coronavirus (MERS-CoV).  
196 The mortality rate of MERS was reported to be 35%<sup>24</sup>, and can be transmitted from human to  
197 human<sup>25</sup>, which raises the need for a fast and sensitive onsite diagnostic test. The probe pairs  
198 for the MERS-specific gene, *upE* (Supplementary Table 3), exhibited similar sensitivity and  
199 linearity to the bacterial cases (Fig. 4d). Likewise, we designed a probe pair for the Influenza  
200 A virus-specific target gene, HA (hemagglutinin) gene (Supplementary Table 3). SENSR was  
201 able to detect the Influenza A RNA target with similar sensitivity and linearity (Fig. 4e).  
202 Finally, we designed a probe pair for a recently emerging pathogen, SARS-CoV-2. The target

203 sequence was selected based on the standard real-time RT-PCR assay for the SARS-CoV-2<sup>26</sup>,  
204 which aimed at the RNA-dependent RNA polymerase (*RdRp*) gene (Supplementary Table 3).  
205 Again, SENSR successfully detected its target RNA as low as 0.1 aM, which corroborates the  
206 high adaptability of this method to various RNA markers (Fig. 2f).

207 Taken together, we demonstrated that SENSR could be easily reconfigured to detect  
208 various RNA markers of pathogens by redesigning the probes. The probe design process is  
209 simple and requires a small amount of computation using open web-based software. All probe  
210 pairs tested showed high sensitivity and linearity for detecting RNA markers, reinforcing the  
211 robustness of the probe design process and the wide expandability of SENSR.

212

### 213 **Direct detection of a pathogen using SENSR**

214 Next, we employed SENSR for the detection of RNA samples derived from the live cells of a  
215 pathogen. We targeted MRSA, whose marker RNA was detected by SENSR. Methicillin-  
216 Sensitive *Staphylococcus aureus* (MSSA) that contains no target mRNA was used as a  
217 negative control. MRSA and MSSA cells were heated to 95 °C to lyse the cells and to release  
218 RNAs. The samples were then diluted and added to SENSR reaction to investigate the  
219 specificity and sensitivity (Fig. 5a). We observed a significant difference in fluorescence  
220 intensity between MRSA and MSSA (Fig. 5b). The RNA sample from only 2 CFU per 100  
221 µL reaction of MRSA, not MSSA, was clearly detected by SENSR, thereby indicating its  
222 high sensitivity and specificity even with samples of the living pathogen. Finally, the  
223 performance of SENSR was further validated using samples prepared in human serum (Fig.  
224 5c). The sensitivity and specificity of SENSR were unaffected by the presence of human  
225 serum (Fig. 5d), indicating the suitability of SENSR in practical applications.

226

### 227 **Dual target detection using orthogonal SENSR probes**

228 Finally, we expanded the capability of SENSR to enable the simultaneous detection of two  
229 target RNAs in a single reaction by leveraging simple probe design. The detection of multiple  
230 biomarkers is frequently needed to make a better decision by reducing false-positive and  
231 false-negative results. Based on the high specificity of SENSR probes and availability of  
232 light-up RNA aptamers with distinct spectral properties<sup>27</sup>, we hypothesized that we could  
233 design two sets of SENSR probes that operate orthogonally in a single reaction to detect their  
234 respective target RNAs.

235 First, we developed an orthogonal reporter probe for Influenza A virus. Since the  
236 MRSA infection causes flu-like symptoms, discrimination of this pathogen from common  
237 Influenza A virus is required. Furthermore, the patient with the influenza A infection is more  
238 susceptible to the MRSA infection<sup>28</sup>. Collectively, simultaneous detection and discrimination  
239 of both pathogens can help the diagnosis and follow-up actions. An orthogonal reporter probe  
240 for Influenza A virus was designed by replacing its aptamer template region with the template  
241 for the Broccoli aptamer<sup>29-32</sup> which binds to DFHBI-1T ((5Z)-5-[(3,5-Difluoro-4-  
242 hydroxyphenyl)methylene]-3,5-dihydro-2-methyl-3-(2,2,2-trifluoroethyl)-4H-imidazol-4-  
243 one) and exhibits spectral properties distinct from that of the malachite green aptamer.  
244 Secondary structures of the new reporter probe and corresponding full-length RNA transcript  
245 were simulated, using NUPACK, and satisfied the probe design criteria without further  
246 optimization (Supplementary Table 2). Dual detection of MRSA and Influenza A virus was  
247 tested in SENSR reactions in which the two probe pairs, their cognate fluorogenic dyes, and  
248 various concentrations of the target RNAs were added (Fig. 6a). When the probe pairs are  
249 hybridized to their respective target RNAs, and successful transcription follows, the RNA  
250 aptamers would bind their cognate dyes and emit distinguishable fluorescence. The presence  
251 of each target RNA could be determined by the fluorescence patterns from the SENSR  
252 reaction: malachite green aptamer fluorescence for MRSA, and Broccoli aptamer

253 fluorescence for Influenza A virus. Indeed, the presence of either target RNA (1 nM) was  
254 easily detected by the fluorescence pattern (Fig. 6b). Across various concentrations of each  
255 target RNA, the SENSR probes specifically produced fluorescence that responded only to  
256 respective targets, thereby enabling orthogonal dual detection of two pathogens (Fig. 6c).

257 Lastly, we applied the orthogonal dual detection to the SARS-CoV-2, which has many  
258 related viruses with high sequence homology. Simultaneous detection of multiple target sites  
259 along its genome would enable specific discrimination of this emerging pathogen from  
260 others. In addition to the previously demonstrated SARS-CoV-2 probe pair (Fig. 4f), we  
261 designed three additional probe pairs for other regions in the *RdRp* gene with either the  
262 malachite green aptamer or the Broccoli aptamer (Fig. 7a). Each probe pair contained a  
263 discriminatory base at either the 5'-end of PP or 3'-end of RP, which are unique to SARS-  
264 CoV-2 against other similar viruses. Mismatches between the probes and nontarget RNAs  
265 would inhibit ligation and subsequent SENSR reaction and could enable more specific  
266 detection of SARS-CoV-2. Indeed, all four probe pairs were able to detect 1 aM of SARS-  
267 CoV-2 RNA, thereby exhibiting higher fluorescence intensity compared to that of the related  
268 viral RNA sequences (Fig. 7b). We then tested the orthogonal dual detection of two target  
269 regions using the SARS-CoV-2-MG1 and SARS-CoV-2-BR2 probe pairs. Dual SENSR  
270 assay effectively detected the target RNA and maintained the specificity of each probe pair  
271 (Fig. 7c). Therefore, the dual SENSR assay could be used to assist diagnostic decision  
272 making by providing two detection results that can complement each other.

273

## 274 **Discussion**

275 Rapid, simple, economical, and sensitive diagnostic tests are needed to detect and manage  
276 infectious diseases at the earliest possible time. However, conventional approaches lack one  
277 or more of these features. Culture-based methods are time-consuming (>24 h)<sup>33</sup> while PCR-

278 based methods, including real-time-PCR, require a complex procedure, expensive  
279 instruments, and skilled expertise. Various isothermal amplification methods for RNA have  
280 been introduced to replace traditional methods<sup>7,8</sup>, but they generally require numerous  
281 reaction components, often making them expensive and incompatible with the signal  
282 production step.

283 In contrast, SENSR satisfies many desirable requirements for onsite diagnostic tests  
284 for pathogens, such as short turnaround time (30 min), low limit of detection (0.1 aM),  
285 inexpensive instrumentation and reagents, and a simple diagnostic procedure. SENSR  
286 integrates all component reaction steps using the specially designed probes that contain all  
287 required functional parts: promoter, hybridization sequence to target, and an aptamer  
288 template. Even with the multifaceted features of the SENSR probes, the design process is  
289 systematic and straightforward. Therefore, new SENSR assay can be promptly developed for  
290 emerging pathogens as exemplified by the successful design of SENSR assay for SARS-  
291 CoV-2.

292 The probe design is unique in that two DNA probes are designed to expose single-  
293 stranded target recognition parts, enabling hybridization of the target RNA and the probes at  
294 37°C. The hybridization sequences were systematically selected using the nucleic acid design  
295 software Primer-BLAST and NUPACK to minimize any structure formation while  
296 maximizing hybridization to the target RNA. The efficient hybridization between the probes  
297 and target RNA is one of the reasons for enabling high sensitivity during the isothermal  
298 reaction.

299 The promoter probe is programmed to form a stem-loop structure and the stem part  
300 forms a double-stranded T7 promoter sequence that initiates transcription by recruiting T7  
301 RNA polymerase. Since the two strands of T7 promoter part are physically connected by the  
302 loop, the probability of formation of a functional double-stranded promoter is higher in the

303 stem-loop structured design than when each strand of the promoter is not connected by the  
304 loop. Thus, the hairpin structured, self-assembling promoter sequence in the promoter probe  
305 can facilitate hybridization and subsequent transcription more efficiently.

306 The initiated transcription elongates through the single-stranded DNA as a template to  
307 amplify target RNAs containing aptamer RNAs. The use of a fluorogenic RNA aptamer  
308 facilitated SENSR development by enabling fast and straightforward signal generation.  
309 Compared to conventional fluorescent protein outputs, the use of RNA aptamers as reporters  
310 can reduce the time it takes to observe the signal<sup>34</sup>.

311 The simple enzyme composition is another reason to enable one-step and one-pot  
312 detection. The fewer the enzymes, the easier it is to optimize in terms of temperature and  
313 buffer composition. In designing the detection scheme, we deliberately tried to reduce the  
314 number of enzymes, thus creating one of the simplest isothermal detection schemes based on  
315 two enzymes: SplintR ligase for target detection and T7 RNA polymerase for amplification.

316 In addition to the results shown in this study, we expect that SENSR has a broad range  
317 of possibilities for pathogen detection. First, SENSR can be easily implemented in the initial  
318 screening of infectious diseases at places where a large number of people gather and  
319 transfer<sup>35,36</sup>. With a short turnaround time and a simple reaction composition, SENSR is an  
320 ideal diagnostic test for rapid and economical screening. Second, SENSR will be a valuable  
321 platform for the immediate development of diagnostic tests for emerging pathogens<sup>1,37</sup>  
322 because of the simple probe design process and broad adaptability of SENSR. In this work,  
323 we demonstrated the successful application of SENSR to six pathogens, using minimal  
324 redesign based on the highly modular structure of the probes. In theory, SENSR detection  
325 probes can be designed for any RNA as long as the target nucleic acid sequence is available.  
326 This feature provides SENSR a significant advantage over antibody-based diagnostics to  
327 rapidly respond to the outbreak of infectious disease. The nucleic acid probe synthesis is

328 more scalable than animal antibody production. Therefore, SENSR is more suitable for rapid  
329 mass production of diagnostic kits than antibody-based diagnostics. Future efforts on  
330 automated probe design will be needed to accelerate the development of SENSR assays for  
331 newly emerging pathogens.

332 In conclusion, SENSR is a powerful diagnostic platform for RNA detection, which  
333 offers a short turnaround time, high sensitivity and specificity, and a simple assay procedure,  
334 and eliminates the need for expensive instrumentations and diagnostic specialists. Given the  
335 simple probe design process, and its rapid development, SENSR will be a suitable diagnostic  
336 method for emerging infectious diseases.

## 337 **Methods**

338 **Materials.** SplintR ligase, T7 RNA polymerase, extreme thermostable single-stranded DNA  
339 binding protein (ET-SSB), DNase I (RNase-free), and ribonucleotide solution mix were  
340 obtained from New England Biolabs (NEB, Ipswich, MA, USA). Recombinant RNase  
341 Inhibitor and pMD20 T-vector were obtained from Takara (Shiga, Japan). Malachite green  
342 oxalate was purchased from Sigma-Aldrich (St. Louis, MO, USA). Dithiothreitol was  
343 acquired from Thermo Fisher Scientific (Waltham, MA, USA). Potassium chloride and 5'-  
344 phosphate modified oligonucleotides were obtained from Bioneer, Inc. (Daejeon, Republic of  
345 Korea). Full-length probe oligonucleotides were synthesized from Integrated DNA  
346 Technologies, Inc. (IDT, Coralville, IA, USA). Oligonucleotides other than these were  
347 synthesized from Cosmogenetech, Inc. (Seoul, Republic of Korea).

348  
349 **Preparation of target RNA.** Target RNA was synthesized by an *in vitro* transcription  
350 process. To accomplish this, the template DNA containing the target RNA region was  
351 amplified by PCR with primer, including the T7 promoter sequence, and cloned into pMD20  
352 T-vector. The PCR amplicon was used as a template for *in vitro* transcription. A transcription  
353 reaction mixture containing 1 µg of target DNA, 2 µL 10× T7 RNA polymerase reaction  
354 buffer, 1 µL DTT (1 mM), 0.8 µL NTPs (1 mM for each NTP), 0.5 µL Recombinant RNase  
355 Inhibitor (20 U), 2 µL T7 RNA polymerase (50 U), and 8.7 µL RNase-free water was  
356 incubated at 37 °C for 16 h. The resulting reaction products were treated with 1 µL of DNase  
357 I (RNase-free) for 1 h at 37 °C. The transcript was purified using the Riboclear™ (plus!)  
358 RNA kit (GeneAll, Seoul, Republic of Korea) and quantified using the absorbance at 260 nm.  
359 The purified RNA was used immediately for the downstream reaction or stored at -80 °C. The  
360 RNA transcripts were assessed by an Agilent 2100 Bioanalyzer (Agilent Technologies, Santa



361 Clara, CA, USA) using an RNA 6000 nano kit (Agilent Technologies) following the  
362 manufacturer's direction. All primers are listed in Supplementary Table 4.

363

364 **Preparation of MSSA and MRSA cell lysates.** MRSA (NCCP 15919) and MSSA (NCCP  
365 11488) were obtained from the Korea Centers for Disease Control and Prevention (Osong,  
366 Republic of Korea) and cultured for 24 h at 37 °C in 5% sheep blood agar (SBA) (Hanil  
367 Komed, Seoul, Republic of Korea). Cells were heat lysed at 95 °C for 2 min.

368

369 **Preparation of proxy clinical sample.** Human serum was purchased from EMD Millipore  
370 Corporation (Temecula, CA, USA). MRSA (NCCP 15919) and MSSA (NCCP 11488) were  
371 spiked into human serum. Human serum was diluted at a 1/7 ratio in RNase-free water<sup>9</sup> and  
372 the diluted human serum was heat lysed at 95 °C for 2 min.

373

374 **RNA-splinted ssDNA ligation assay.** The ligation reaction was performed according to a  
375 previously reported method<sup>17</sup>. In summary, 200 nM PP, 220 nM RP, and 220 nM target RNA  
376 were added to 4 µL reaction buffer containing 10 mM Tris-HCl (pH 7.4), and 50 mM KCl in  
377 RNase-free water. The mixture was heated to 95 °C for 3 min, then slowly cooled to room  
378 temperature. This was followed by the addition of 1 µL 10x SplintR buffer and 0.5 µL of  
379 SplintR ligase (25 U), and incubation of the mixture at 37 °C for 30 min. The reaction was  
380 terminated by heating at 95 °C for 10 min. The ligated product was amplified through PCR  
381 reaction with LigChk\_F and LigChk\_R primers (Supplementary Table 4). The PCR products  
382 were assessed by an Agilent 2100 Bioanalyzer using a DNA 1000 kit (Agilent Technologies)  
383 according to the manufacturer's protocol.

384

385 **Malachite green and aptamer binding assay.** A 1  $\mu\text{M}$  solution of RNA transcript  
386 containing malachite green aptamer was mixed with a reaction buffer (50 mM Tris-HCl at pH  
387 7.5, 1 mM ATP, 10 mM NaCl, and 140 mM KCl) to produce 90  $\mu\text{L}$  of solution. The mixture  
388 was heated to 95  $^{\circ}\text{C}$  for 10 min and left at room temperature for 20 min. A 5  $\mu\text{L}$  solution of  
389 10 mM  $\text{MgCl}_2$  was added to the mixture and allowed to stabilize at room temperature for 15  
390 min, followed by addition of 5  $\mu\text{L}$  of 320  $\mu\text{M}$  malachite green solution to produce a total  
391 volume of 100  $\mu\text{L}$ . The mixture was incubated at room temperature for 30 min. After  
392 incubation, fluorescence intensity was measured using a microplate reader (Hidex,  
393 Lemminkäisenkatu, Finland) in 384-well clear flat-bottom black polystyrene microplates  
394 (Corning Inc., Corning, NY, USA). For the malachite green aptamer fluorescence, the  
395 excitation wavelength was 616 nm with a slit width of 8.5 nm, and the emission wavelength  
396 was 665 nm with a slit width of 7.5 nm. Background intensity from the malachite green  
397 buffer containing 16  $\mu\text{M}$  malachite green was subtracted from all fluorescence intensities.  
398

399 **SENSR protocol.** The one-step, isothermal reaction master mix consisted of the following  
400 components: 2  $\mu\text{L}$  of 1  $\mu\text{M}$  PP, 2.2  $\mu\text{L}$  of 1  $\mu\text{M}$  RP, 5  $\mu\text{L}$  of 320  $\mu\text{M}$  malachite green solution  
401 (or 20  $\mu\text{L}$  of 50  $\mu\text{M}$  DFHBI-1T solution), 0.8  $\mu\text{L}$  of ET-SSB, 0.5  $\mu\text{L}$  Recombinant RNase  
402 Inhibitor (20 U), 10  $\mu\text{L}$  of SplintR ligase, 5  $\mu\text{L}$  of T7 RNA polymerase (50 U), and 10  $\mu\text{L}$  of  
403 10 $\times$  SENSR buffer containing 50 mM Tris-HCl (pH 7.4), 10 mM  $\text{MgCl}_2$ , 1 mM of each  
404 NTPs, and 10.5 mM NaCl. The reaction master mix was adjusted to 99.22  $\mu\text{L}$  in RNase-free  
405 water and 0.78  $\mu\text{L}$  of target RNA was added to produce a total volume of 100  $\mu\text{L}$ . The  
406 reaction solution was incubated at 37  $^{\circ}\text{C}$  for 2 hr. After incubation, fluorescence intensity was  
407 measured by a Hidex Sense Microplate Reader, as described above. Background intensity  
408 from the SENSR buffer containing 16  $\mu\text{M}$  malachite green was subtracted from all malachite  
409 green fluorescence intensities. For the Broccoli aptamer fluorescence, the excitation

410 wavelength was 460 nm with a slit width of 20 nm, and the emission wavelength was 520 nm  
411 with a slit width of 14 nm. Background intensity from the 10  $\mu$ M DFHBI-1T solution was  
412 subtracted from all DFHBI-1T fluorescence intensities.

413 For dual detection, we used the following reaction mixture: 2  $\mu$ L of 1  $\mu$ M PP1, 2.2  $\mu$ L  
414 of 1  $\mu$ M RP1, 2  $\mu$ L of 1  $\mu$ M PP2, 2.2  $\mu$ L of 1  $\mu$ M RP2, 5  $\mu$ L of 320  $\mu$ M malachite green  
415 solution, 20  $\mu$ L of 50  $\mu$ M DFHBI-1T solution, 0.8  $\mu$ L of ET-SSB, 0.5  $\mu$ L Recombinant  
416 RNase Inhibitor (20 U), 10  $\mu$ L of SplintR ligase, 5  $\mu$ L of T7 RNA polymerase (50 U), and 10  
417  $\mu$ L of 10 $\times$  SENSR buffer. The reaction master mix was adjusted to 99.22  $\mu$ L in RNase-free  
418 water and added to 0.78  $\mu$ L of target RNA, producing a total volume 100  $\mu$ L. The remaining  
419 steps are identical to the single target detection.

420

## 421 **Acknowledgments**

422 This research was supported by C1 Gas Refinery Program through the National Research  
423 Foundation of Korea (NRF) funded by the Ministry of Science and ICT (NRF-  
424 2015M3D3A1A01064926). This work was also supported by an NRF grant funded by the  
425 Korea government (MSIT) (No. 2018R1C1B3007409). This research was also supported by  
426 “Human Resources Program in Energy Technology” of the Korea Institute of Energy  
427 Technology Evaluation and Planning (KETEP), which granted financial resource from the  
428 Ministry of Trade, Industry & Energy, Republic of Korea (No. 20194030202330).

429

## 430 **Author information**

### 431 **Chang Ha Woo and Sungho Jang**

432 These authors contributed equally to this work

### 433 **Affiliations**

434 *School of Interdisciplinary Bioscience and Bioengineering, Pohang University of Science and*  
435 *Technology, 77 Cheongam-ro, Nam-gu, Pohang, Gyeongbuk 37673, Korea*

436 Chang Ha Woo, Giyoung Shin, Gyoo Yeol Jung & Jeong Wook Lee

437 *Department of Chemical Engineering, Pohang University of Science and Technology, 77*

438 *Cheongam-ro, Nam-gu, Pohang, Gyeongbuk 37673, Korea*

439 Sungho Jang, Gyoo Yeol Jung & Jeong Wook Lee

### 440 **Present address**

441 Department of Biomedical Engineering and Biological Design Center, Boston University,

442 Boston, MA 02215, USA

443 Sungho Jang

### 444 **Author contributions**

445 J.W.L. conceived the project. C.H.W., S.J., G.S., G.Y.J., and J.W.L. designed the experiment.

446 C.H.W., S.J., and G.S. performed the experiments. C.H.W., S.J., G.S., G.Y.J., and J.W.L.

447 analyzed the results. C.H.W., S.J., G.S., G.Y.J., and J.W.L. wrote the manuscript.

448 **Competing interests**

449 C.H.W., S.J., G.S., G.Y.J., & J.W.L. have submitted a provisional patent application (No. 10-

450 2019-0046713) relating to the one-step isothermal RNA detection.

451 **Correspondence**

452 Correspondence to Jeong Wook Lee and Gyoo Yeol Jung.

453 **References**

454

- 455 1. Caliendo, A. M. *et al.* Better tests, better care: improved diagnostics for infectious  
456 diseases. *Clin Infect Dis* **57 Suppl 3**, S139–70 (2013).
- 457 2. Rajapaksha, P. *et al.* A review of methods for the detection of pathogenic  
458 microorganisms. *Analyst (Lond)* **144**, 396–411 (2019).
- 459 3. Sintchenko, V. & Gallego, B. Laboratory-guided detection of disease outbreaks: three  
460 generations of surveillance systems. *Arch Pathol Lab Med* **133**, 916–925 (2009).
- 461 4. O'Connor, L. & Glynn, B. Recent advances in the development of nucleic acid  
462 diagnostics. *Expert Rev Med Devices* **7**, 529–539 (2010).
- 463 5. Pavšič, J. *et al.* Standardization of nucleic acid tests for clinical measurements of bacteria  
464 and viruses. *J Clin Microbiol* **53**, 2008–2014 (2015).
- 465 6. Dong, J., Olano, J. P., McBride, J. W. & Walker, D. H. Emerging pathogens: challenges  
466 and successes of molecular diagnostics. *J Mol Diagn* **10**, 185–197 (2008).
- 467 7. Zhao, Y., Chen, F., Li, Q., Wang, L. & Fan, C. Isothermal amplification of nucleic acids.  
468 *Chem Rev* **115**, 12491–12545 (2015).
- 469 8. Yan, L. *et al.* Isothermal amplified detection of DNA and RNA. *Mol Biosyst* **10**, 970–  
470 1003 (2014).
- 471 9. Pardee, K. *et al.* Rapid, Low-Cost Detection of Zika Virus Using Programmable  
472 Biomolecular Components. *Cell* **165**, 1255–1266 (2016).
- 473 10. Gootenberg, J. S. *et al.* Nucleic acid detection with CRISPR-Cas13a/C2c2. *Science* **356**,  
474 438–442 (2017).
- 475 11. Gootenberg, J. S. *et al.* Multiplexed and portable nucleic acid detection platform with  
476 Cas13, Cas12a, and Csm6. *Science* **360**, 439–444 (2018).
- 477 12. Cao, W. Recent developments in ligase-mediated amplification and detection. *Trends*

- 478 *Biotechnol* **22**, 38–44 (2004).
- 479 13. Stuppia, L., Antonucci, I., Palka, G. & Gatta, V. Use of the MLPA assay in the  
480 molecular diagnosis of gene copy number alterations in human genetic diseases. *Int J*  
481 *Mol Sci* **13**, 3245–3276 (2012).
- 482 14. Shin, G. W. *et al.* Stuffer-free multiplex ligation-dependent probe amplification based on  
483 conformation-sensitive capillary electrophoresis: a novel technology for robust multiplex  
484 determination of copy number variation. *Electrophoresis* **33**, 3052–3061 (2012).
- 485 15. Chung, B. *et al.* Rapid and sensitive detection of lower respiratory tract infections by  
486 stuffer-free multiplex ligation-dependent probe amplification. *Electrophoresis* **35**, 511–  
487 514 (2014).
- 488 16. Chung, B. *et al.* Precise H1N1 swine influenza detection using stuffer-free multiplex  
489 ligation-dependent probe amplification in conformation-sensitive capillary  
490 electrophoresis. *Anal Biochem* **424**, 54–56 (2012).
- 491 17. Jin, J., Vaud, S., Zhelkovsky, A. M., Posfai, J. & McReynolds, L. A. Sensitive and  
492 specific miRNA detection method using SplintR Ligase. *Nucleic Acids Res* **44**, e116  
493 (2016).
- 494 18. Ying, Z.-M. *et al.* Spinach-based fluorescent light-up biosensors for multiplexed and  
495 label-free detection of microRNAs. *Chem Commun (Camb)* **54**, 3010–3013 (2018).
- 496 19. Kukarin, A., Rong, M. & McAllister, W. T. Exposure of T7 RNA polymerase to the  
497 isolated binding region of the promoter allows transcription from a single-stranded  
498 template. *J Biol Chem* **278**, 2419–2424 (2003).
- 499 20. National Center for Biotechnology Information. Primer-BLAST. at  
500 <<https://www.ncbi.nlm.nih.gov/tools/primer-blast/index.cgi>>
- 501 21. Zadeh, J. N. *et al.* NUPACK: Analysis and design of nucleic acid systems. *J Comput*

- 502        *Chem* **32**, 170–173 (2011).
- 503    22. Marlowe, E. M. & Bankowski, M. J. Conventional and Molecular Methods for the  
504        Detection of Methicillin-Resistant *Staphylococcus aureus*. *J Clin Microbiol* **49**, S53–S56  
505        (2011).
- 506    23. Woolhouse, M. E. J. & Brierley, L. Epidemiological characteristics of human-infective  
507        RNA viruses. *Scientific data* **5**, 180017 (2018).
- 508    24. Alsolamy, S. & Arabi, Y. M. Infection with Middle East respiratory syndrome  
509        coronavirus. *Canadian journal of respiratory therapy : CJRT = Revue canadienne de la*  
510        *thérapie respiratoire : RCTR* **51**, 102 (2015).
- 511    25. Mackay, I. M. & Arden, K. E. MERS coronavirus: diagnostics, epidemiology and  
512        transmission. *Virology* **12**, 222 (2015).
- 513    26. Victor/Charité Virology, C. *et al.* Diagnostic detection of 2019-nCoV by real-time RT-  
514        PCR. *Diagnostic detection of 2019-nCoV by real-time RT-PCR* (2020). at  
515        <[https://www.who.int/docs/default-source/coronaviruse/protocol-v2-](https://www.who.int/docs/default-source/coronaviruse/protocol-v2-1.pdf?sfvrsn=a9ef618c_2)  
516        [1.pdf?sfvrsn=a9ef618c\\_2](https://www.who.int/docs/default-source/coronaviruse/protocol-v2-1.pdf?sfvrsn=a9ef618c_2)>
- 517    27. Bouhedda, F., Autour, A. & Ryckelynck, M. Light-Up RNA Aptamers and Their  
518        Cognate Fluorogens: From Their Development to Their Applications. *Int J Mol Sci* **19**,  
519        (2017).
- 520    28. Mulcahy, M. E. & McLoughlin, R. M. *Staphylococcus aureus* and Influenza A Virus:  
521        Partners in Coinfection. *MBio* **7**, (2016).
- 522    29. Filonov, G. S., Moon, J. D., Svensen, N. & Jaffrey, S. R. Broccoli: rapid selection of an  
523        RNA mimic of green fluorescent protein by fluorescence-based selection and directed  
524        evolution. *J Am Chem Soc* **136**, 16299–16308 (2014).
- 525    30. Filonov, G. S. & Jaffrey, S. R. RNA Imaging with Dimeric Broccoli in Live Bacterial



- 526 and Mammalian Cells. *Curr Protoc Chem Biol* **8**, 1–28 (2016).
- 527 31. Okuda, M., Fourmy, D. & Yoshizawa, S. Use of Baby Spinach and Broccoli for imaging  
528 of structured cellular RNAs. *Nucleic Acids Res* **45**, 1404–1415 (2017).
- 529 32. Torelli, E. *et al.* Isothermal folding of a light-up bio-orthogonal RNA origami  
530 nanoribbon. *Sci. Rep.* **8**, 6989 (2018).
- 531 33. Sinha, M. *et al.* Emerging technologies for molecular diagnosis of sepsis. *Clin Microbiol*  
532 *Rev* **31**, (2018).
- 533 34. Alam, K. *et al.* Rapid, Low-Cost Detection of Water Contaminants Using Regulated In  
534 Vitro Transcription. *BioRxiv* (2019). doi:10.1101/619296
- 535 35. Gaber, W., Goetsch, U., Diel, R., Doerr, H. W. & Gottschalk, R. Screening for infectious  
536 diseases at international airports: the frankfurt model. *Aviat Space Environ Med* **80**, 595–  
537 600 (2009).
- 538 36. Khan, K. *et al.* Entry and exit screening of airline travellers during the A(H1N1) 2009  
539 pandemic: a retrospective evaluation. *Bull World Health Organ* **91**, 368–376 (2013).
- 540 37. Identification and Diagnosis of Newly Emerging Pathogens. *Infectious Diseases and*  
541 *Translational Medicine* (2017).
- 542

543 **Figures**

544 **Fig. 1**

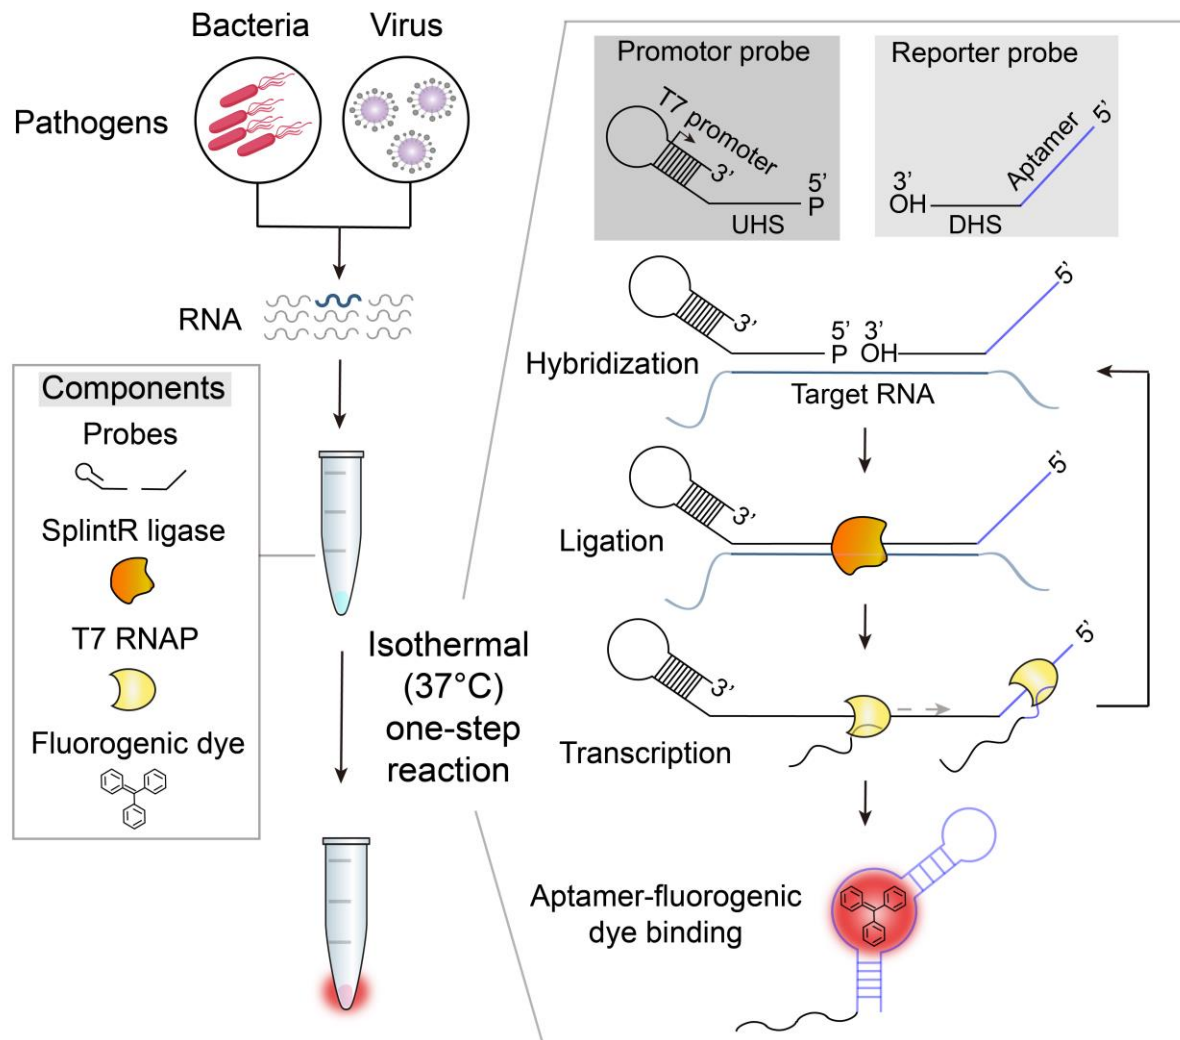

545

546 **Fig. 1: Schematic illustration of SENSr, a one-step isothermal reaction cascade for**

547 **rapid detection of RNAs.** The reaction is composed of four main components: a set of

548 probes, SplintR ligase, T7 RNA polymerase (T7 RNAP), and a fluorogenic dye. In the

549 presence of target RNA, hybridization, ligation, transcription, and aptamer-dye binding

550 reactions occur sequentially in a single reaction tube at a constant temperature. UHS,

551 upstream hybridization sequence; DHS, downstream hybridization sequence.

552 **Fig. 2**

**a Ligation**

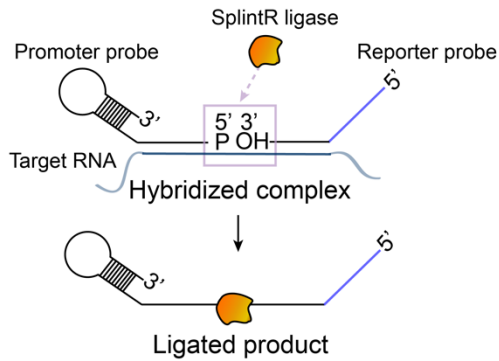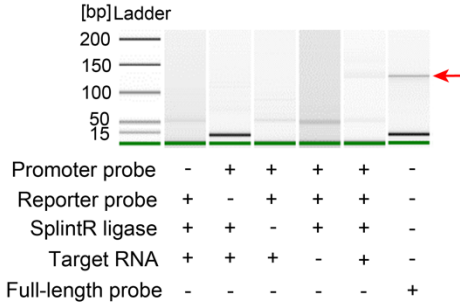

**b Transcription**

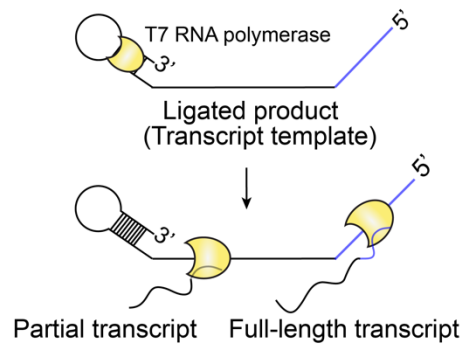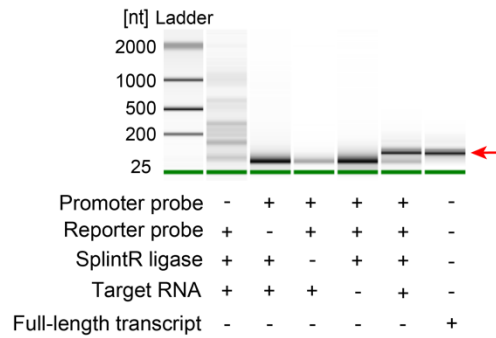

**c Aptamer-fluorogenic dye binding**

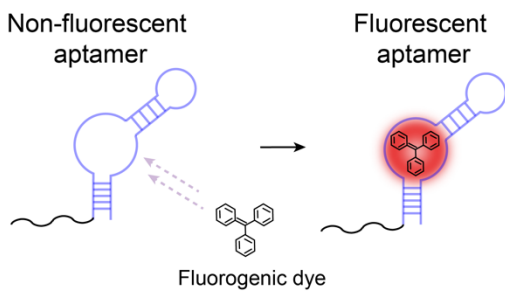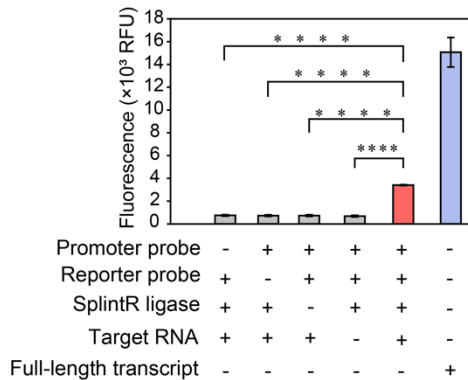

553

554 **Fig. 2: Construction of the three components reactions of SENSR. a, Ligation reaction.**

555 The ligation resultants were amplified with a pair of PCR primers (LigChk\_F,R in

556 Supplementary Table 4) and analyzed using Bioanalyzer. The ligation reaction occurred

557 when only the promoter probe, reporter probe, SplintR ligase, and target RNA were all

558 present. A full-length probe combining the promoter and reporter probes was amplified with

559 the same set of PCR primers and used as a size control, as indicated by the red arrow. **b**,  
560 Transcription reaction. The ligated mixtures were used as a DNA template to validate  
561 transcription. The transcript was obtained only in the presence of target RNA and all other  
562 components, demonstrating both target-dependent ligation and the subsequent transcription.  
563 The red arrow points to the correct size of the transcript. **c**, Fluorescence reaction. After  
564 sequential ligation and transcription reactions, the reaction mixture with the correct size of  
565 the transcript produced higher fluorescence compared to other conditions that lack one of the  
566 necessary components. Fluorescence tests are four experimental replicas (two-tailed student's  
567 test; \*  $P < 0.05$ , \*\*  $P < 0.01$ , \*\*\*  $P < 0.001$ , \*\*\*\*  $P < 0.0001$ ; bars represent mean  $\pm$  s.d).

568 **Fig. 3**

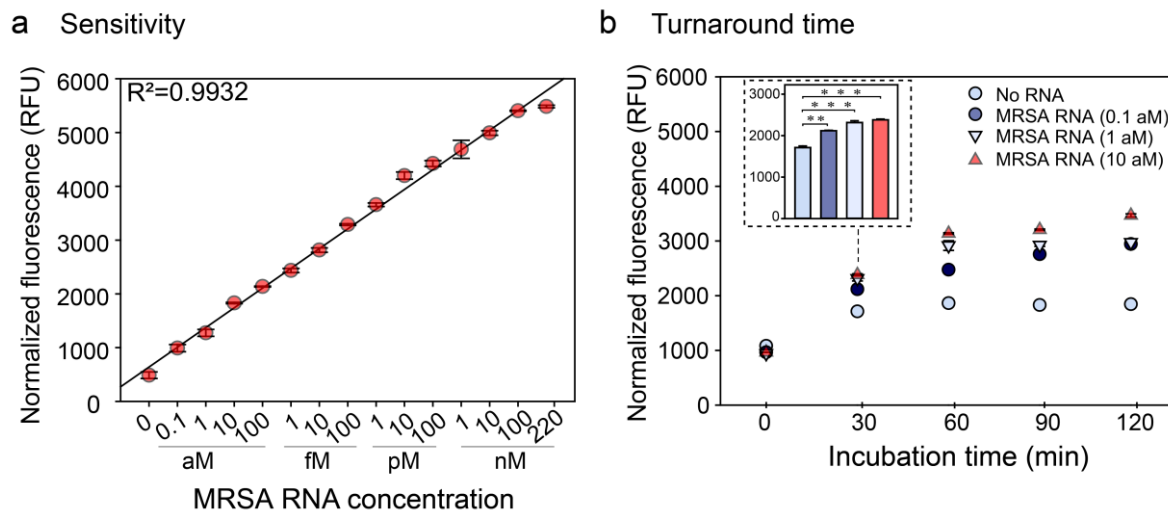

569

570 **Fig. 3: Sensitivity and turnaround time of SENSR.** **a**, Sensitivity of SENSR. The target  
571 RNA from 220 nM to 0.1 aM was tested. The detection limit is 0.1 aM. High linearity  
572 suggests that SENSR can be used for the quantification of the target RNA. **b**, Turnaround  
573 time of SENSR. To check the time required for the SENSR reaction, the incubation time of  
574 SENSR was varied. The target RNA of 0.1 aM was detected as early as 30 min. All tests are  
575 four experimental replicas (two-tailed student's test; \*  $P < 0.05$ , \*\*  $P < 0.01$ , \*\*\*  $P < 0.001$ ,  
576 \*\*\*\*  $P < 0.0001$ ; bars represent mean  $\pm$  s.d).

577 **Fig. 4**

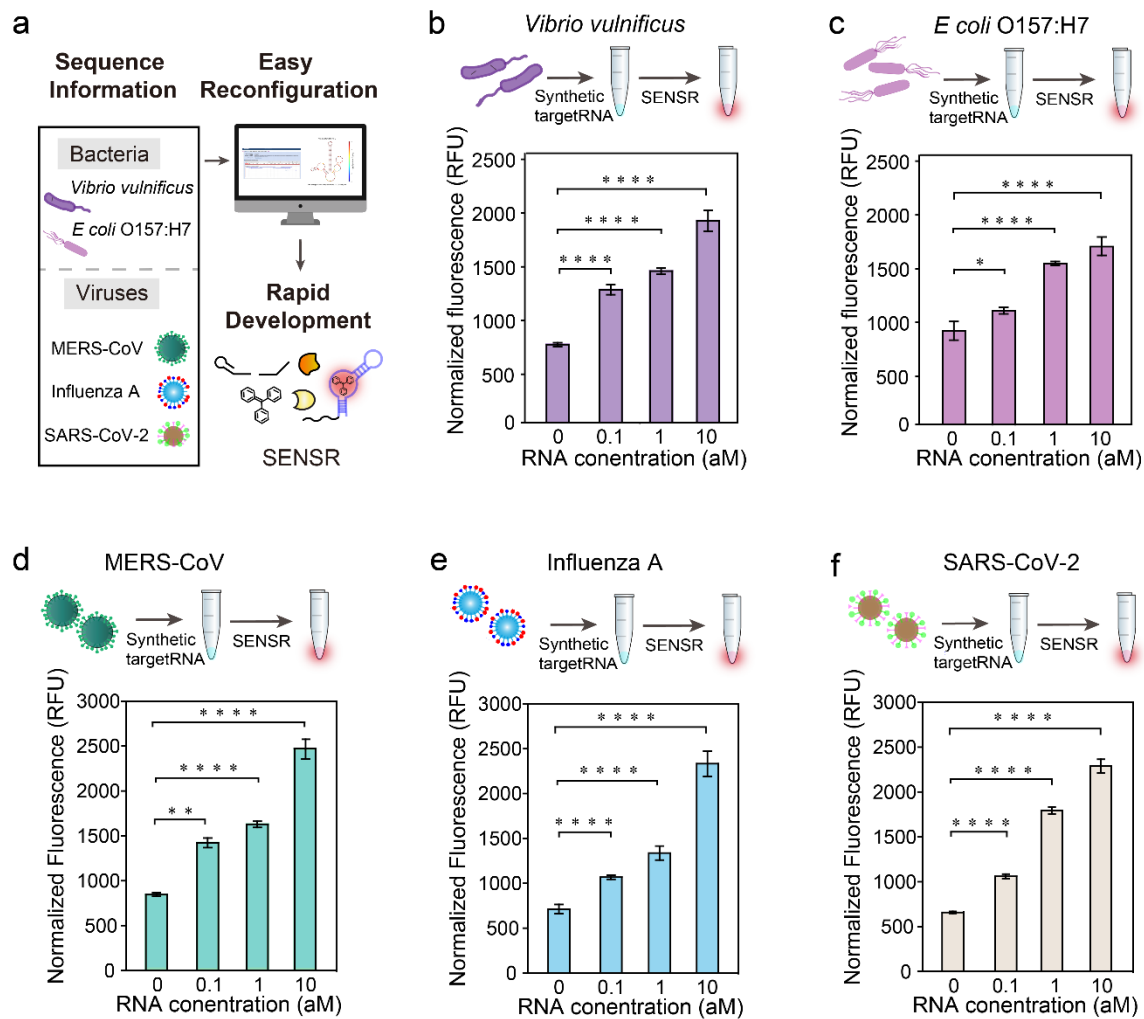

578

579 **Fig. 4: Broad adaptability of SENSR.** Two pathogenic microbes and three viruses were  
 580 targeted by redesigning probe sequences. **a**, Schematic of SENSR with easy reconfiguration  
 581 and rapid development. **b,c**, Detection of bacterial RNA markers, for *V. vulnificus* and *E. coli*  
 582 *O157:H7*, respectively. **d,e,f**, Detection of viral RNA markers, MERS-CoV, Influenza A, and  
 583 SARS-CoV-2, respectively. All probe pairs tested showed high sensitivity and linearity to  
 584 detect RNA markers. All tests are four experimental replicas (two-tailed student's test; \*  $P <$   
 585 0.05, \*\*  $P <$  0.01, \*\*\*  $P <$  0.001, \*\*\*\*  $P <$  0.0001; bars represent mean  $\pm$  s.d).

586 **Fig. 5**

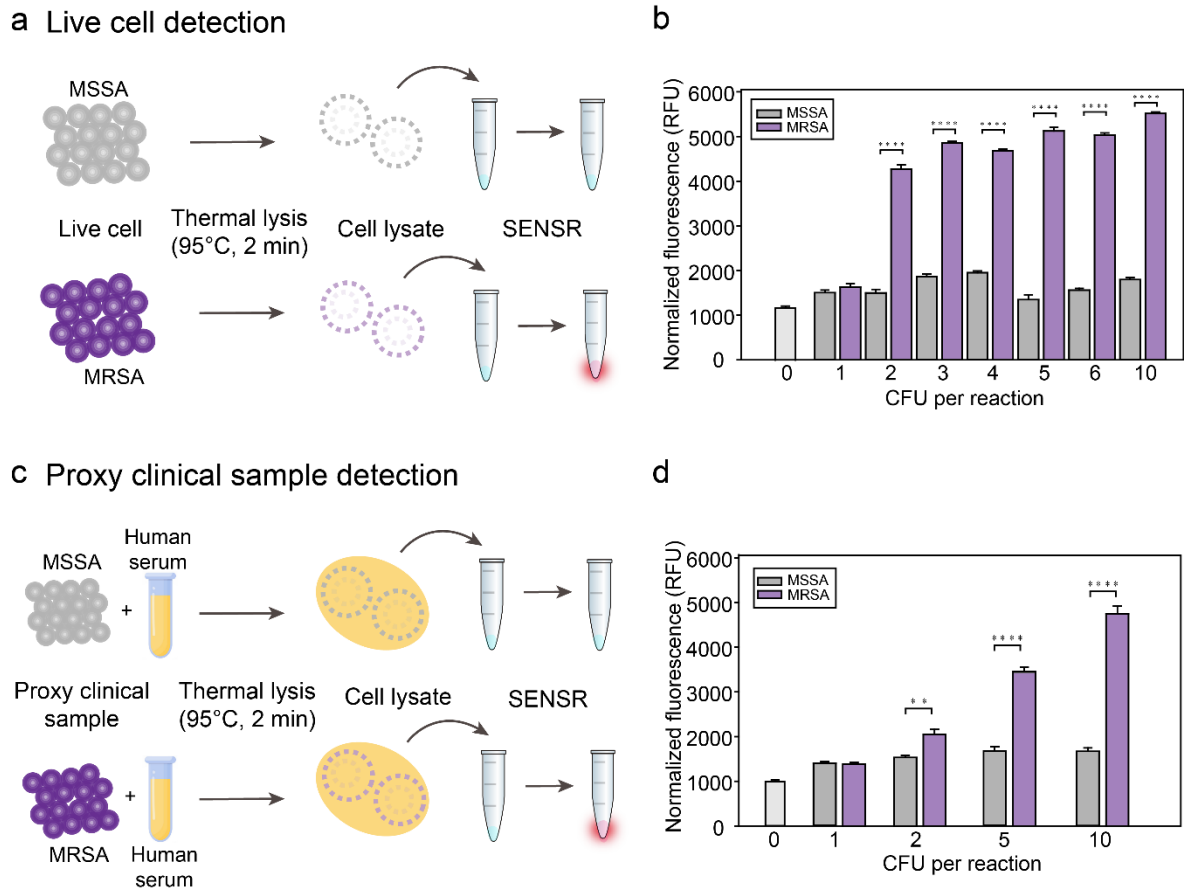

587

588 **Fig. 5: Live cell and proxy clinical sample detection using SENSR. a**, Direct detection of  
 589 bacterial cells. Thermal cell lysates of MRSA and MSSA were subjected to the SENSR  
 590 reaction. **b**, Clear distinction in the fluorescence intensity between MRSA and MSSA  
 591 samples. The detection limit of SENSR is as low as 2 CFU per 100  $\mu$ L reaction. **c**, Detection  
 592 of bacterial cell diluted in human serum as a proxy clinical sample. Bacteria-contained human  
 593 serum was thermally lysed and subjected to the SENSR reaction. **d**, An obvious distinction in  
 594 the fluorescence intensity between MRSA- and MSSA-contained human serum was  
 595 observed. The detection limit of SENSR is as low as 2 CFU per 100  $\mu$ L reaction. All tests are  
 596 four experimental replicas (two-tailed student's test; \*  $P < 0.05$ , \*\*  $P < 0.01$ , \*\*\*  $P < 0.001$ ,  
 597 \*\*\*\*  $P < 0.0001$ ; bars represent mean  $\pm$  s.d).

598 **Fig. 6**

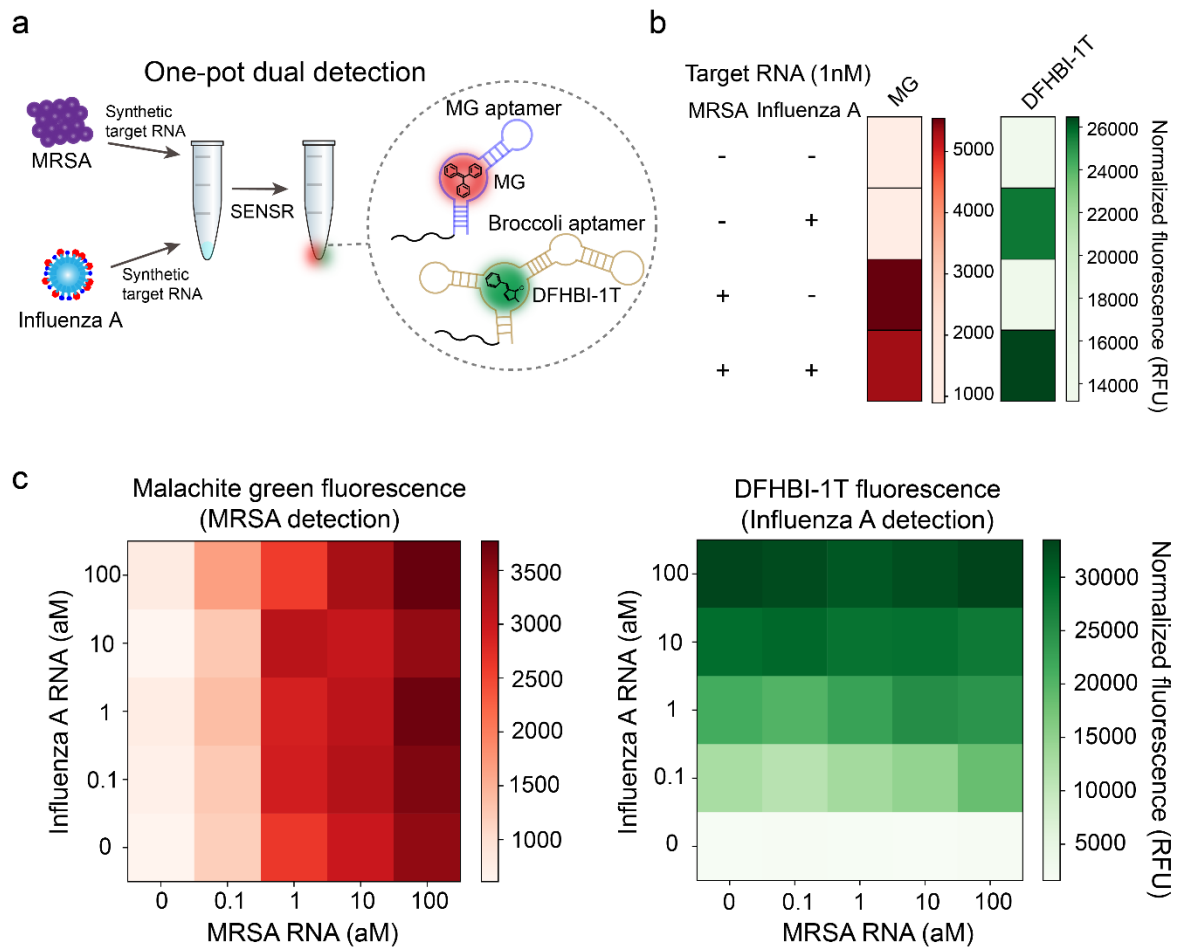

599

600 **Fig. 6: One-pot dual detection of RNAs by SENSR.** **a**, One-pot dual detection of MRSA  
601 and Influenza A. The dual SENSR mixture contains two orthogonal pairs of probes and  
602 fluorogenic dyes with other components. Each probe pair hybridizes to the corresponding  
603 target RNA and allows SENSR reaction, emitting fluorescence that is distinguishable from  
604 each other. **b**, Validation of orthogonal dual SENSR reaction. Presence of each target RNA (1  
605 nM) was determined by the intensities of non-overlapping fluorescence. **c**, One-pot dual  
606 SENSR detection of MRSA and Influenza A with various concentration combinations. All  
607 tests are four experimental replicas.



608 **Fig. 7**

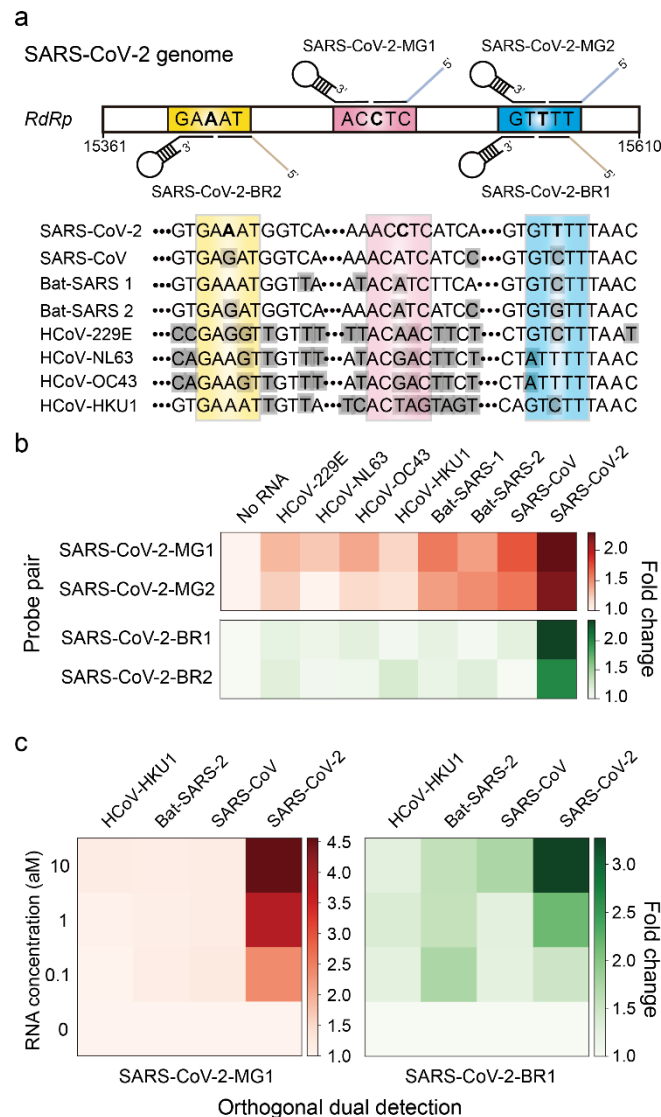

609

610 **Fig. 7: Dual detection of SARS-CoV-2 by SENSR.** **a**, Probe design for dual SENSR  
 611 detection. Three regions in the RNA-dependent RNA polymerase (*RdRp*) gene of SARS-  
 612 CoV-2 were targeted. Discriminatory bases that enable specific detection of SARS-CoV-2  
 613 against viruses with highly similar sequences are marked by bold letters. Grey shades indicate  
 614 mismatches between the sequences of SARS-CoV-2 and other viruses. **b**, Singleplex  
 615 detection of 1 aM SARS-CoV-2 RNA by SENSR. 229E, *Human coronavirus 229E*; NL63,  
 616 *Human coronavirus NL63*; OC43, *Human coronavirus OC43*; HKU1, *Human coronavirus*  
 617 *HKU1*; Bat-SARS-1, Mg772933 *Bat SARS-related coronavirus*; Bat-SARS-2, NC\_014470

618 *Bat SARS-related coronavirus; SARS-CoV, Severe acute respiratory syndrome-related*  
619 *coronavirus; SARS-CoV-2, Severe acute respiratory syndrome-related coronavirus 2. c,*  
620 One-pot dual detection of SARS-CoV-2 by orthogonal probe pairs, SARS-CoV-2-MG1 and -  
621 BR1. All tests are two experimental replicas. Fold changes were calculated by dividing the  
622 normalized fluorescence values by that with no target RNA.
